# Supplementary material for: Accuracy and Precision of Equine Gait Event Detection during Walking with Limb and Trunk Mounted Inertial Sensors
Source: PubMed Central journal article supplement (PMC3436021; doi:10.3390/s120608145), 2012-06-12
Supplement: sensors-12-08145-s001.pdf [file sensors-12-08145-s001.pdf]

Supplementary Information

## Accuracy and Precision of Equine Gait Event Detection during Walking with Limb and Trunk Mounted Inertial Sensors. *Sensors* 2012, 12, 8145-8156

Emil Olsen <sup>1,2,\*</sup>, Pia Haubro Andersen <sup>1</sup> and Thilo Pfau <sup>2</sup>

<sup>1</sup> Department of Large Animal Sciences, Faculty of Health and Medical Science, University of Copenhagen, Hojbakkegaard Alle 5, 2630 Taastrup, Denmark; E-Mail: pia@life.ku.dk

<sup>2</sup> Department of Veterinary Clinical Sciences, The Royal Veterinary College, North Mymms, Hawkshead Road, North Mymms, Herts, AL9 7TA, UK; E-Mail: tpfau@rvc.ac.uk

\* Author to whom correspondence should be addressed; E-Mail: eo@life.ku.dk; Tel.: +45-2092-1986; Fax: +45-3533-2944.

**Table 1.** Filtering of data streams and the feature used for stride detection. X is cranio-caudal, Y is latero-lateral, Z is dorso-ventral in a right-handed horse based Cartesian coordinate system.

| Sensor location | Front limb     | Hind limb      | Hoof On | Hoof Off | Data stream  | Original signal                                 | Axes        | Feature (per stride) | Filter Type <sup>1</sup>                            | Filter cutoff/level * |
|-----------------|----------------|----------------|---------|----------|--------------|-------------------------------------------------|-------------|----------------------|-----------------------------------------------------|-----------------------|
| DMC/DMT         | √ <sup>2</sup> | √              | √       | √        | Displacement |                                                 | X           |                      | -                                                   | -                     |
|                 | √              | - <sup>3</sup> | √       | -        |              |                                                 |             |                      |                                                     |                       |
|                 |                | -              | -       | -        | Velocity     | +rotated <sup>4</sup><br>+filtered <sup>5</sup> | Z           | Local peaks          | Butterworth                                         | 30 Hz                 |
|                 | √              | -              | √       | -        |              |                                                 |             | Absolute min         | Butterworth                                         |                       |
|                 |                | √              | √       | √        |              |                                                 |             | Local min peak       | Wavelet                                             |                       |
|                 |                | -              | -       | -        |              |                                                 |             | Local max peak       | Wavelet                                             |                       |
|                 | √              | √              | √       | √        | Magnitude    | XYZ                                             | Local peaks | Wavelet              | FL <sup>6</sup> :level4<br>HL <sup>7</sup> : level3 |                       |

Table 1. Cont.

| Sensor location | Front limb | Hind limb | Hoof On | Hoof Off    | Data stream      | Original signal        | Axes                     | Feature (per stride)                      | Filter Type <sup>1</sup>                            | Filter cutoff/level *    |
|-----------------|------------|-----------|---------|-------------|------------------|------------------------|--------------------------|-------------------------------------------|-----------------------------------------------------|--------------------------|
| DMC/DMT         |            |           |         |             |                  |                        |                          | On: Absolute minima                       |                                                     |                          |
|                 |            | -         |         | √           |                  |                        |                          | Off: Absolute maxima                      | Butterworth                                         | FL: 15 Hz<br>HL: 30 Hz   |
|                 | √          | √         | √       | -           | Angular velocity |                        | Y                        | HL: Local peaks<br>Zero crossing          |                                                     |                          |
|                 |            | √         |         | √           |                  |                        |                          | On: Zero crossing<br>Off: absolute minima | Wavelet                                             | level4                   |
|                 | √          | √         | -       | √           |                  | -rotated <sup>8</sup>  |                          | Local peaks                               | Butterworth                                         | FL: 30 Hz<br>HL: 20 Hz   |
|                 | √          | √         | √       | √           |                  | -filtered <sup>9</sup> |                          |                                           | Wavelet                                             | level 3                  |
|                 | √          | √         | -       | √           |                  | +rotated               |                          | Local peaks                               | Butterworth                                         | FL:30Hz<br>HL: 20Hz      |
|                 | √          | √         | √       | √           |                  | -filtered              | X                        |                                           | Wavelet                                             | level 3                  |
|                 |            | √         |         | √           |                  |                        |                          |                                           | Butterworth                                         | FL:30Hz<br>HL: 20Hz      |
|                 | √          |           | √       | √           |                  | +rotated<br>+filtered  |                          | Local peaks                               | Wavelet                                             | FL: level4<br>HL: level3 |
|                 |            | √         |         | √           | Acceleration     |                        |                          |                                           | Butterworth                                         | 20 Hz                    |
|                 | √          | √         | √       | -           |                  | -rotated<br>-filtered  |                          | Local peaks                               | Wavelet                                             | FL: level4<br>HL: level3 |
|                 | √          | √         | √       | √           |                  | +rotated<br>-filtered  | Z                        |                                           | Butterworth                                         | FL: 6 Hz<br>HL: 60 Hz    |
|                 |            | √         |         | √           |                  |                        |                          |                                           | Wavelet                                             | level 3                  |
|                 | √          | √         | √       | √           |                  | +rotated<br>+filtered  |                          | On: Maxima<br>Off: local peaks            | Butterworth                                         | 30 Hz                    |
|                 | √          | √         | √       | √           |                  |                        |                          | Local peaks                               | Wavelet                                             | level 3                  |
|                 | √          | √         | √       | √           |                  | Magnitude              | XYZ                      | Local peaks                               | Wavelet                                             | level 4                  |
| √               | √          | √         | √       | Orientation |                  | X                      | Absolute minima & maxima | Butterworth                               | FL: 30 Hz<br>HL:<br>12 Hz,<br>6 <sup>th</sup> order |                          |

Table 1. Cont.

| Sensor location | Front limb | Hind limb | HoofOn | Hoof Off | Data stream  | Original signal       | Axes | Feature (per stride)       | Filter Type <sup>1</sup> | Filter cutoff/level *                          |
|-----------------|------------|-----------|--------|----------|--------------|-----------------------|------|----------------------------|--------------------------|------------------------------------------------|
| DMC/DMT         | -          | -         | -      | -        |              |                       |      | Local peaks                | Wavelet                  | level4                                         |
|                 | √          | √         | √      | √        |              |                       | Y    | Absolute minima and maxima | Butterworth              | FL: 30 Hz<br>HL: 8 Hz<br>6 <sup>th</sup> order |
|                 | √          | -         | √      | √        |              |                       |      | Local peaks                | Wavelet                  | level 4<br>6 <sup>th</sup> order               |
|                 | √          | -         | √      | √        |              |                       | Z    | Absolute minima and maxima | Butterworth              | lowpass,<br>5 Hz                               |
|                 | √          | √         | √      | -        |              | Magnitude             | XYZ  | Local peaks                | Wavelet                  | level 4                                        |
| Withers         | √          | -         | √      | √        |              |                       | X    | Local peaks                | Butterworth              | Bandpass<br>0.1–20 Hz                          |
|                 |            | -         |        |          | Velocity     |                       |      |                            | Wavelet                  | level 4                                        |
|                 | √          | -         | √      | -        |              |                       | Z    | Local peaks                | Butterworth              | Bandpass<br>0.35–5 Hz                          |
|                 | √          | -         | √      | -        |              | -rotated<br>-filtered | X    | Local peaks                | Butterworth              | Bandpass<br>0.35–5 Hz                          |
|                 |            | -         |        | √        | Acceleration |                       |      |                            | Wavelet                  | level 4                                        |
|                 | √          | -         | √      | -        |              | +rotated              | X    | Local peaks                | Butterworth              | Bandpass<br>0.35–5 Hz                          |
| Tuber Coxae     | -          | √         | √      | √        |              | -rotated              |      | Local peaks                | Butterworth              | 10 Hz                                          |
|                 | -          | √         | √      | √        |              | -filtered             | X    |                            | Wavelet                  | level3                                         |
|                 | -          | √         | √      | √        |              | +rotated              |      | Local peaks                | Butterworth              | 10 Hz                                          |
|                 | -          | √         | √      | √        |              | -filtered             |      |                            | Wavelet                  | level4                                         |
|                 | -          | √         | √      | -        | Acceleration | -rotated<br>-filtered |      | Local peaks                | Butterworth              | Bandpass<br>0.35–10 Hz                         |
|                 | -          | √         | √      | -        |              | +rotated<br>-filtered | Z    |                            |                          | Bandpass                                       |
|                 | -          | √         | √      | √        | Velocity     |                       | Z    | Local peaks                | Butterworth              | 20 Hz                                          |

Table 1. Cont.

| Sensor location | Front limb | Hind limb | HoofOn | Hoof Off | Data stream  | Original signal | Axes        | Feature (per stride) | Filter Type <sup>1</sup> | Filter cutoff/level * |
|-----------------|------------|-----------|--------|----------|--------------|-----------------|-------------|----------------------|--------------------------|-----------------------|
| Sacrum          | -          | √         | √      | √        | Acceleration | -rotated        | X           | Local peaks          | Butterworth              | 10 Hz                 |
|                 | -          | √         | √      | √        |              | -filtered       |             |                      | Wavelet                  | level3                |
|                 | -          | √         | √      | √        |              | +rotated        | Z           | Local peaks          | Butterworth              | 10 Hz                 |
|                 | -          | √         | √      | √        |              | -filtered       |             |                      | Wavelet                  | level3                |
|                 | -          | √         | √      | -        | -rotated     | XYZ             | Local peaks | Butterworth          | Bandpass                 | 0.35–10 Hz            |
|                 | -          | √         | √      | √        | -filtered    |                 |             |                      |                          |                       |
|                 | -          | √         | √      | √        | Velocity     | Magnitude       | Z           | Local peaks          | Wavelet                  | level4                |
|                 | -          | √         | √      | √        |              |                 | XYZ         | Local peaks          | Wavelet                  | level3                |

1: All Butterworth filters are 4<sup>th</sup> order and low-pass unless stated and all wavelet decomposition filters are symlets 4 with the level stated. 2: Features in the data stream resembling hoof-on/off was found. 3: Features resembling hoof-on/off was not found. 4: Rotated from local sensor into global horse based reference system. 5: Filtered before rotation. 6: Front Limb. 7: Hind Limb. 8: Not rotated from local sensor into global horse based reference system. 9: Not filtered before rotation.

Full Results Tables:

**Table 2.** Agreement and descriptive statistics for all front limb gait events derived from DMC/DMT mounted IMUs. All values are in ms. Values in bold have the lowest accuracy and precision.

| Front Limb |                                                      | Agreement        |                  |              |                  | Descriptive Statistics |             |              |
|------------|------------------------------------------------------|------------------|------------------|--------------|------------------|------------------------|-------------|--------------|
| Gait Event | Feature                                              | LCL <sup>1</sup> | UCL <sup>2</sup> | Bias         | ICC <sup>3</sup> | Median Error           | SE Mean     | SD           |
| Hoof-on    | Acceleration vector                                  | -7.46            | 18.33            | 5.44         | 0.9993           | 28                     | 2.90        | 32.30        |
|            | <b>Horizontal velocity</b>                           | <b>-16.52</b>    | <b>1.77</b>      | <b>-7.38</b> | <b>0.9992</b>    | <b>-38</b>             | <b>2.06</b> | <b>22.95</b> |
|            | Vertical Velocity                                    | -16.31           | 10.84            | -2.73        | 0.9995           | -20                    | 2.98        | 33.20        |
| Hoof-off   | Acceleration vector                                  | -16.46           | 14.41            | -1.02        | 0.9994           | 5                      | 3.53        | 39.20        |
|            | Horizontal acceleration <sup>4</sup>                 | -14.36           | 16.78            | 1.21         | 0.9994           | 5                      | 3.59        | 39.84        |
|            | <b>Horizontal acceleration<sup>5</sup></b>           | <b>-13.86</b>    | <b>15.26</b>     | <b>0.70</b>  | <b>0.9994</b>    | <b>10</b>              | <b>3.35</b> | <b>37.17</b> |
|            | Latero-medial pitch                                  | -34.10           | -3.45            | -18.77       | 0.9959           | -85                    | 3.51        | 38.89        |
| Stance     | Hoof on; Horizontal velocity                         | -77.06           | 76.31            | -0.38        | 0.8384           | 8                      | 3.54        | 39.09        |
|            | Hoof off; Acceleration vector                        |                  |                  |              |                  |                        |             |              |
|            | <b>Hoof on; Horizontal velocity</b>                  | <b>-73.80</b>    | <b>73.75</b>     | <b>-0.02</b> | <b>0.8391</b>    | <b>5</b>               | <b>3.40</b> | <b>37.54</b> |
|            | <b>Hoof off; Horizontal acceleration<sup>5</sup></b> |                  |                  |              |                  |                        |             |              |
|            | Hoof on; Horizontal velocity                         | -73.71           | 73.30            | -0.21        | 0.8515           | 12                     | 3.40        | 37.55        |
|            | Hoof off; Latero-medial pitch                        |                  |                  |              |                  |                        |             |              |

1: Lower limits of agreement, 2: Upper limits of agreement, 3: Intra Class Correlation, 4: Before rotation. 5: Before rotation, wavelet decomposed.

**Table 3.** Agreement and descriptive statistics for all hind limb gait events derived from DMC/DMT and sacrum mounted IMUs. Where nothing else is stated the features are DMC/DMT derived. All values are in ms. Values in bold have the lowest accuracy and precision.

| Hind Limb                              |                                               | Agreement        |                  |              |                  | Descriptive Statistics |             |              |
|----------------------------------------|-----------------------------------------------|------------------|------------------|--------------|------------------|------------------------|-------------|--------------|
| Gait Event                             | Feature                                       | LCL <sup>1</sup> | UCL <sup>2</sup> | Bias         | ICC <sup>3</sup> | Median Error           | SE Mean     | SD           |
| Hoof-on                                | Acceleration vector                           | -12.36           | 13.45            | 0.54         | 0.9996           | 5                      | 2.99        | 32.53        |
|                                        | Velocity vector                               | -6.91            | 15.48            | 4.28         | 0.9996           | 25                     | 2.62        | 28.31        |
|                                        | Horizontal acceleration <sup>4</sup>          | -11.33           | 9.88             | -0.73        | 0.9998           | -5                     | 2.45        | 26.60        |
|                                        | Horizontal acceleration <sup>5</sup>          | -12.88           | 17.35            | 2.24         | 0.9995           | 10                     | 3.55        | 38.58        |
|                                        | Horizontal acceleration <sup>6</sup>          | -12.50           | 12.06            | -0.22        | 0.9997           | -5                     | 2.81        | 30.48        |
|                                        | Horizontal acceleration <sup>7</sup>          | -12.66           | 16.00            | 1.67         | 0.9995           | 8                      | 3.34        | 36.31        |
|                                        | Horizontal acceleration <sup>8</sup>          | -12.66           | 16.00            | 1.67         | 0.9995           | 8                      | 3.34        | 36.31        |
|                                        | Horizontal displacement                       | -6.99            | 14.16            | 3.58         | 0.9997           | 20                     | 2.45        | 26.62        |
|                                        | <b>Vertical acceleration <sup>5</sup></b>     | <b>-13.50</b>    | <b>5.96</b>      | <b>-3.77</b> | <b>0.9997</b>    | <b>-20</b>             | <b>2.28</b> | <b>24.79</b> |
|                                        | Vertical acceleration <sup>6</sup>            | -16.52           | 4.03             | -6.25        | 0.9994           | -30                    | 2.38        | 25.89        |
|                                        | Vertical acceleration <sup>9</sup>            | -15.90           | 13.14            | -1.38        | 0.9995           | 0                      | 3.38        | 36.68        |
| Vertical velocity, sacrum <sup>7</sup> | -11.33                                        | 17.11            | 2.89             | 0.9995       | 13               | 3.32                   | 36.03       |              |
| Hoof-off                               | Velocity vector                               | -3.69            | 15.98            | 6.15         | 0.9995           | 35                     | 2.32        | 25.03        |
|                                        | Horizontal acceleration <sup>4</sup>          | -15.26           | 15.75            | 0.24         | 0.9995           | 15                     | 3.64        | 39.07        |
|                                        | Horizontal acceleration <sup>5</sup>          | -11.19           | 13.42            | 1.11         | 0.9997           | 10                     | 2.90        | 31.21        |
|                                        | Horizontal acceleration <sup>6</sup>          | -5.91            | 11.48            | 2.78         | 0.9998           | 20                     | 2.05        | 22.04        |
|                                        | Horizontal acceleration <sup>7</sup>          | -12.37           | 18.98            | 3.30         | 0.9994           | 15                     | 3.67        | 39.48        |
|                                        | Horizontal acceleration <sup>8</sup>          | -12.37           | 18.98            | 3.30         | 0.9994           | 15                     | 3.67        | 39.48        |
|                                        | <b>Horizontal displacement</b>                | <b>-2.08</b>     | <b>14.42</b>     | <b>6.17</b>  | <b>0.9995</b>    | <b>35</b>              | <b>1.95</b> | <b>21.00</b> |
|                                        | Latero-medial angular velocity                | -16.94           | 5.27             | -5.84        | 0.9995           | -25                    | 2.54        | 27.39        |
|                                        | Latero-medial pitch                           | -9.33            | 17.50            | 4.09         | 0.9995           | 30                     | 3.09        | 33.24        |
| Vertical acceleration <sup>4</sup>     | -18.15                                        | 13.89            | -2.13            | 0.9995       | -10              | 3.69                   | 39.74       |              |
| Stance                                 | Hoof-on: Acceleration vector                  | -73.00           | 72.95            | -0.02        | 0.8483           | 2                      | 3.44        | 36.87        |
|                                        | Hoof-off: Velocity vector                     |                  |                  |              |                  |                        |             |              |
|                                        | Hoof-on: Velocity vector                      | -65.23           | 67.02            | 0.90         | 0.8661           | 1                      | 3.14        | 33.56        |
|                                        | Hoof-off: Velocity vector                     |                  |                  |              |                  |                        |             |              |
|                                        | Hoof-on: Horizontal acceleration <sup>4</sup> | -65.87           | 65.81            | -0.03        | 0.8747           | 1                      | 3.10        | 33.20        |
|                                        | Hoof-off: Velocity vector                     |                  |                  |              |                  |                        |             |              |
|                                        | Hoof-on: Horizontal acceleration <sup>6</sup> | -72.28           | 72.27            | -0.01        | 0.8618           | 3                      | 3.37        | 36.10        |
| Hoof-off: Velocity vector              |                                               |                  |                  |              |                  |                        |             |              |

Table 3. Cont.

| Hind Limb                                      |                                                    | Agreement        |                  |        |                  | Descriptive Statistics |         |       |
|------------------------------------------------|----------------------------------------------------|------------------|------------------|--------|------------------|------------------------|---------|-------|
| Gait Event                                     | Feature                                            | LCL <sup>1</sup> | UCL <sup>2</sup> | Bias   | ICC <sup>3</sup> | Median Error           | SE Mean | SD    |
| Stance                                         | Hoof-on: Horizontal displacement                   | -63.74           | 63.86            | 0.06   | 0.8757           | -3                     | 3.01    | 32.32 |
|                                                | Hoof-off: Velocity vector                          |                  |                  |        |                  |                        |         |       |
|                                                | <b>Hoof-on:</b> Vertical acceleration <sup>4</sup> | -59.39           | 59.25            | -0.07  | 0.8869           | 0                      | 2.83    | 30.31 |
|                                                | Hoof-off: Velocity vector                          |                  |                  |        |                  |                        |         |       |
|                                                | <b>Hoof-on:</b> Vertical acceleration <sup>6</sup> | -61.83           | 61.64            | -0.09  | 0.8815           | -2                     | 2.92    | 31.33 |
|                                                | Hoof-off: Velocity vector                          |                  |                  |        |                  |                        |         |       |
|                                                | <b>Hoof-on:</b> Vertical velocity sacrum           | -77.74           | 77.00            | -0.37  | 0.8376           | 4                      | 3.66    | 39.27 |
|                                                | Hoof-off: Horizontal acceleration <sup>6</sup>     |                  |                  |        |                  |                        |         |       |
|                                                | Hoof-on: Velocity vector                           | -72.36           | 74.93            | 1.29   | 0.8488           | -4                     | 3.51    | 37.44 |
|                                                | Hoof-off: Horizontal acceleration <sup>5</sup>     |                  |                  |        |                  |                        |         |       |
|                                                | Hoof-on: Horizontal acceleration <sup>4</sup>      | -75.51           | 75.89            | 0.19   | 0.8497           | 1                      | 3.57    | 38.27 |
|                                                | Hoof-off: Horizontal acceleration <sup>5</sup>     |                  |                  |        |                  |                        |         |       |
|                                                | Hoof-on: Horizontal displacement                   | -73.51           | 74.06            | 0.28   | 0.8503           | -3                     | 3.49    | 37.40 |
|                                                | Hoof-off: Horizontal acceleration <sup>5</sup>     |                  |                  |        |                  |                        |         |       |
|                                                | Hoof-on: Vertical acceleration <sup>4</sup>        | -69.30           | 69.60            | 0.15   | 0.8607           | 1                      | 3.31    | 35.50 |
|                                                | Hoof-off: Horizontal acceleration <sup>5</sup>     |                  |                  |        |                  |                        |         |       |
|                                                | Hoof-on: Vertical acceleration <sup>5</sup>        | -75.69           | 75.94            | 0.12   | 0.8434           | -2                     | 3.57    | 38.27 |
|                                                | Hoof-off: Horizontal acceleration <sup>5</sup>     |                  |                  |        |                  |                        |         |       |
|                                                | Hoof-on: Acceleration vector                       | -71.10           | 71.46            | 0.18   | 0.8620           | -1                     | 3.35    | 35.92 |
|                                                | Hoof-off: Horizontal acceleration <sup>6</sup>     |                  |                  |        |                  |                        |         |       |
|                                                | Hoof-on: Velocity vector                           | -62.02           | 64.36            | 1.17   | 0.8832           | 2                      | 3.00    | 32.01 |
|                                                | Hoof-off: Horizontal acceleration <sup>6</sup>     |                  |                  |        |                  |                        |         |       |
|                                                | Hoof-on: Horizontal acceleration <sup>4</sup>      | -62.68           | 63.02            | 0.17   | 0.8914           | 2                      | 2.94    | 31.53 |
|                                                | Hoof-off: Horizontal acceleration <sup>6</sup>     |                  |                  |        |                  |                        |         |       |
|                                                | Hoof-on: Horizontal acceleration <sup>6</sup>      | -69.49           | 69.88            | 0.19   | 0.8775           | 10                     | 3.23    | 34.63 |
|                                                | Hoof-off: Horizontal acceleration <sup>6</sup>     |                  |                  |        |                  |                        |         |       |
|                                                | Hoof-on: Horizontal displacement                   | -60.54           | 61.06            | 0.26   | 0.8927           | -1                     | 2.86    | 30.66 |
|                                                | Hoof-off: Horizontal acceleration <sup>6</sup>     |                  |                  |        |                  |                        |         |       |
|                                                | Hoof-on: Vertical acceleration <sup>4</sup>        | -54.39           | 54.66            | 0.13   | 0.9078           | 2                      | 2.60    | 27.91 |
|                                                | Hoof-off: Horizontal acceleration <sup>6</sup>     |                  |                  |        |                  |                        |         |       |
| Hoof-on: Vertical acceleration <sup>6</sup>    | -59.87                                             | 60.09            | 0.11             | 0.8950 | 0                | 2.81                   | 30.18   |       |
| Hoof-off: Horizontal acceleration <sup>6</sup> |                                                    |                  |                  |        |                  |                        |         |       |
| Hoof-on: Vertical velocity sacrum              | -74.28                                             | 73.95            | -0.17            | 0.8565 | 6                | 3.50                   | 37.56   |       |
| Hoof-off: Horizontal acceleration <sup>6</sup> |                                                    |                  |                  |        |                  |                        |         |       |

Table 3. Cont.

| Hind Limb                                   |                                                    | Agreement        |                  |             |                  | Descriptive Statistics |             |              |
|---------------------------------------------|----------------------------------------------------|------------------|------------------|-------------|------------------|------------------------|-------------|--------------|
| Gait Event                                  | Feature                                            | LCL <sup>1</sup> | UCL <sup>2</sup> | Bias        | ICC <sup>3</sup> | Median Error           | SE Mean     | SD           |
| Stance                                      | Hoof-on: Acceleration vector                       | -69.73           | 70.21            | 0.24        | 0.8571           | 2                      | 3.29        | 35.29        |
|                                             | Hoof-off: Horizontal displacement                  |                  |                  |             |                  |                        |             |              |
|                                             | Hoof-on: Velocity vector                           | -60.04           | 62.63            | 1.29        | 0.8813           | 1                      | 2.91        | 31.02        |
|                                             | Hoof-off: Horizontal displacement                  |                  |                  |             |                  |                        |             |              |
|                                             | Hoof-on: Horizontal acceleration <sup>4</sup>      | -60.06           | 60.53            | 0.23        | 0.8916           | 0                      | 2.83        | 30.33        |
|                                             | Hoof-off: Horizontal displacement                  |                  |                  |             |                  |                        |             |              |
|                                             | Hoof-on: Horizontal acceleration <sup>6</sup>      | -66.30           | 66.81            | 0.25        | 0.8791           | 3                      | 3.09        | 33.15        |
|                                             | Hoof-off: Horizontal displacement                  |                  |                  |             |                  |                        |             |              |
|                                             | Hoof-on: Horizontal displacement                   | -58.26           | 58.91            | 0.32        | 0.8921           | -3                     | 2.76        | 29.56        |
|                                             | Hoof-off: Horizontal displacement                  |                  |                  |             |                  |                        |             |              |
|                                             | <b>Hoof-on: Vertical acceleration <sup>4</sup></b> | <b>-54.13</b>    | <b>54.52</b>     | <b>0.20</b> | <b>0.9021</b>    | <b>0</b>               | <b>2.58</b> | <b>27.70</b> |
|                                             | <b>Hoof-off: Horizontal displacement</b>           |                  |                  |             |                  |                        |             |              |
|                                             | Hoof-on: Horizontal acceleration <sup>4</sup>      | -56.56           | 56.90            | 0.17        | 0.8971           | -2                     | 2.67        | 28.67        |
|                                             | Hoof-off: Horizontal displacement                  |                  |                  |             |                  |                        |             |              |
|                                             | Hoof-on: Vertical acceleration <sup>4</sup>        | -78.41           | 78.87            | 0.23        | 0.8211           | -3                     | 3.71        | 39.75        |
|                                             | Hoof-off: Horizontal displacement                  |                  |                  |             |                  |                        |             |              |
|                                             | Hoof-on: Vertical velocity sacrum <sup>4</sup>     | -72.64           | 72.42            | -0.11       | 0.8522           | 4                      | 3.43        | 36.83        |
|                                             | Hoof-off: Horizontal displacement                  |                  |                  |             |                  |                        |             |              |
|                                             | Hoof-on: Velocity vector                           |                  |                  |             |                  |                        |             |              |
|                                             | Hoof-off: Latero-medial angular velocity           | -73.16           | 75.66            | 1.25        | 0.8606           | 1                      | 3.48        | 37.13        |
|                                             | Hoof-on: Horizontal acceleration <sup>4</sup>      |                  |                  |             |                  |                        |             |              |
|                                             | Hoof-off: Latero-medial angular velocity           | -76.65           | 76.68            | 0.02        | 0.8619           | -4                     | 3.52        | 37.79        |
|                                             | Hoof-on: Horizontal displacement                   |                  |                  |             |                  |                        |             |              |
|                                             | Hoof-off: Latero-medial angular velocity           | -72.94           | 73.14            | 0.10        | 0.8673           | -3                     | 3.38        | 36.22        |
|                                             | Hoof-on: Vertical acceleration <sup>4</sup>        |                  |                  |             |                  |                        |             |              |
|                                             | Hoof-off: Latero-medial angular velocity           | -64.22           | 64.18            | -0.02       | 0.8898           | 0                      | 3.01        | 32.28        |
|                                             | Hoof-on: Vertical acceleration <sup>6</sup>        |                  |                  |             |                  |                        |             |              |
|                                             | Hoof-off: Latero-medial angular velocity           | -72.98           | 72.88            | -0.05       | 0.8675           | 3                      | 3.36        | 36.07        |
|                                             | Hoof-on: Vertical acceleration <sup>4</sup>        |                  |                  |             |                  |                        |             |              |
|                                             | Hoof-off: Latero-medial pitch                      | -76.20           | 76.41            | 0.10        | 0.8460           | 6                      | 3.55        | 38.06        |
| Hoof-on: Vertical acceleration <sup>6</sup> |                                                    |                  |                  |             |                  |                        |             |              |
| Hoof-off: Latero-medial pitch               | -79.29                                             | 79.45            | 0.08             | 0.8385      | 8                | 3.67                   | 39.39       |              |

1: Lower limits of agreement, 2: Upper limits of agreement, 3: Intra Class Correlation, 4: Before rotation, 5: Before rotation, wavelet decomposed. 6: After rotation, before filtering. 7: After rotation and filtering, wavelet decomposed. 8: After rotation, before filtering, wavelet decomposed. 9: After rotation and filtering.

**Table 4.** Results from agreement analysis and descriptive statistics for each horse for front limb gait events. Displaying the three algorithms with the lowest accuracy and precision, all based on features from DMC<sup>A</sup>/DMT<sup>B</sup> mounted IMUs<sup>C</sup>. All values are in ms. Values in bold have the lowest accuracy.

| Gait Event        | Feature                                    | Accuracy (Bias) by horse ID |              |              |              |              |              |              |
|-------------------|--------------------------------------------|-----------------------------|--------------|--------------|--------------|--------------|--------------|--------------|
|                   |                                            | A                           | B            | C            | D            | E            | F            | G            |
| <b>Front Limb</b> |                                            |                             |              |              |              |              |              |              |
|                   | XYZ Acceleration magnitude                 | -0.8                        | 10.4         | 13.1         | 48.6         | 31.4         | 41.0         | 31.9         |
| <b>Hoof-on</b>    | <b>Horizontal velocity</b>                 | <b>-20.8</b>                | <b>-40.2</b> | <b>-23.1</b> | <b>-27.4</b> | <b>-47.4</b> | <b>-28.0</b> | <b>-48.6</b> |
|                   | Vertical Velocity                          | 25.8                        | -18.4        | 30.9         | -8.2         | -36.2        | -34.0        | -25.6        |
|                   | XYZ Acceleration magnitude                 | 19.2                        | -14.6        | -11.6        | 13.8         | -11.4        | -4.0         | -9.7         |
| <b>Hoof-off</b>   | Horizontal acceleration <sup>1</sup>       | 7.5                         | 3.6          | -0.63        | 9.0          | 7.8          | 30.0         | 1.7          |
|                   | <b>Horizontal acceleration<sup>2</sup></b> | <b>13.3</b>                 | <b>-3.8</b>  | <b>-1.3</b>  | <b>15.4</b>  | <b>-2.1</b>  | <b>1.0</b>   | <b>8.3</b>   |
| <b>Hind limb</b>  |                                            |                             |              |              |              |              |              |              |
|                   | Horizontal acceleration <sup>3</sup>       | 0.4                         | 0.2          | -7.7         | -1.3         | -21.0        | -22.0        | 19.7         |
| <b>Hoof-on</b>    | <b>Vertical acceleration<sup>4</sup></b>   | <b>-14.1</b>                | <b>-22.8</b> | <b>-27.7</b> | <b>-12.1</b> | <b>-19.8</b> | <b>-35.0</b> | <b>-14.3</b> |
|                   | Vertical acceleration <sup>5</sup>         | -24.6                       | -40.0        | -15.9        | -22.7        | -45.0        | -41.0        | -22.7        |
|                   | XYZ velocity magnitude                     | 27.1                        | 97.5         | 49.5         | -54.6        | 84.2         | 13.0         | 18.0         |
| <b>Hoof-off</b>   | Horizontal acceleration <sup>5</sup>       | 37.1                        | 33.5         | 46.8         | -59.7        | 6.3          | 9.0          | 9.2          |
|                   | <b>Horizontal displacement</b>             | <b>7.9</b>                  | <b>4.8</b>   | <b>-13.2</b> | <b>19.0</b>  | <b>4.3</b>   | <b>-54.0</b> | <b>-15.3</b> |

A: DMC: Distal MetaCarpus; B: Distal MetaTarsus; C: IMUs: Inertial Measurement Units; 1: Before rotation; 2: Before rotation, wavelet decomposed. 3: Before rotation; 4: Before rotation, wavelet decomposed; 5: After rotation, before filtering.

© 2012 by the authors; licensee MDPI, Basel, Switzerland. This article is an open access article distributed under the terms and conditions of the Creative Commons Attribution license (<http://creativecommons.org/licenses/by/3.0/>).
